# Supplementary material for: Non-covalent interactions of the carcinogen (+)-anti-BPDE with exon 1 of the human K-ras proto-oncogene
Source: Royal Society of Chemistry journal article supplement (doi:10.1039/c3cp55049d), 2014-01-01
Supplement: c3cp55049d1.pdf [file c3cp55049d1.pdf]

## Non-covalent interactions of the carcinogen (+)-*anti*-BPDE with exon 1 of the human K-ras proto-oncogene

Christos Deligkaris and Jorge H. Rodriguez\*

*Theoretical and Computational Biomolecular Physics Group*

*Department of Physics, Purdue University, West Lafayette, IN 47907*

### Supplementary Material

Table S1. Cartesian coordinates of (+)-*anti*-BPDE with rotatable hydroxyl groups corresponding to type I site.

|   |          |          |           |
|---|----------|----------|-----------|
| C | -1.81600 | 28.25900 | 388.91000 |
| C | -2.17700 | 29.19900 | 388.04600 |
| C | -1.59000 | 30.41000 | 387.86400 |
| C | -0.52100 | 30.74700 | 388.75300 |
| C | 0.09600  | 32.02300 | 388.64200 |
| C | 1.12000  | 32.40300 | 389.46800 |
| C | 1.61500  | 31.44600 | 390.48100 |
| C | 2.60200  | 31.78100 | 391.33900 |
| C | 3.11800  | 30.87700 | 392.21600 |
| C | 4.33200  | 31.28800 | 393.09400 |
| C | 4.47900  | 30.40600 | 394.33500 |
| C | 4.30900  | 28.98000 | 394.07100 |
| C | 3.38300  | 28.54200 | 393.06600 |
| C | 2.64200  | 29.56100 | 392.28000 |
| C | 1.51100  | 29.22600 | 391.45000 |
| C | 0.88200  | 27.91600 | 391.60000 |
| C | -0.19300 | 27.63100 | 390.76800 |
| C | -0.71600 | 28.54000 | 389.78900 |
| C | -0.07700 | 29.83600 | 389.69200 |
| C | 1.01200  | 30.16500 | 390.54200 |
| O | 4.79900  | 28.51500 | 392.77600 |
| O | 4.20000  | 32.66300 | 393.50000 |
| H | 3.22900  | 32.75600 | 393.90000 |
| O | 5.74800  | 30.71600 | 394.93000 |
| H | 5.31900  | 31.19700 | 395.77200 |

Table S2. Cartesian coordinates of (+)-*anti*-BPDE with rotatable hydroxyl groups corresponding to type **Ila** site.

|   |          |          |           |
|---|----------|----------|-----------|
| C | 2.44200  | 24.24300 | 211.58600 |
| C | 2.22100  | 25.52500 | 211.32700 |
| C | 1.27200  | 26.31900 | 211.88500 |
| C | 0.35700  | 25.69100 | 212.78700 |
| C | -0.69000 | 26.46200 | 213.36200 |
| C | -1.59800 | 25.91500 | 214.22900 |
| C | -1.46500 | 24.48900 | 214.59800 |
| C | -2.35000 | 23.89300 | 215.42500 |
| C | -2.18400 | 22.60500 | 215.83400 |
| C | -3.17100 | 22.01400 | 216.87800 |
| C | -3.18600 | 20.48400 | 216.86600 |
| C | -1.85800 | 19.88100 | 216.79700 |
| C | -0.81200 | 20.52900 | 216.05700 |
| C | -1.09600 | 21.83300 | 215.40700 |
| C | -0.20900 | 22.42200 | 214.43400 |
| C | 0.84500  | 21.60000 | 213.84400 |
| C | 1.68600  | 22.21300 | 212.92400 |
| C | 1.57500  | 23.58600 | 212.52300 |
| C | 0.50200  | 24.35600 | 213.11700 |
| C | -0.38700 | 23.75300 | 214.04500 |
| O | -0.80000 | 20.60000 | 217.50100 |
| O | -4.50100 | 22.50500 | 216.62900 |
| H | -5.09800 | 22.14100 | 217.41800 |
| O | -3.93500 | 20.05600 | 218.01300 |
| H | -4.85800 | 20.41800 | 217.63600 |

Table S3. Cartesian coordinates of (+)-*anti*-BPDE with rotatable hydroxyl groups corresponding to type **IIb** site.

|   |          |          |           |
|---|----------|----------|-----------|
| C | -1.30300 | 11.52800 | 189.42300 |
| C | -2.09400 | 10.48400 | 189.22100 |
| C | -2.00300 | 9.26300  | 189.80900 |
| C | -0.88500 | 9.05000  | 190.67600 |
| C | -0.71000 | 7.77300  | 191.27800 |
| C | 0.34300  | 7.50900  | 192.11300 |
| C | 1.30400  | 8.59000  | 192.41800 |
| C | 2.37500  | 8.37400  | 193.21100 |
| C | 3.21500  | 9.38600  | 193.56200 |
| C | 4.35900  | 9.09800  | 194.57300 |
| C | 5.48300  | 10.13300 | 194.49100 |
| C | 5.01200  | 11.51300 | 194.40300 |
| C | 3.79700  | 11.81200 | 193.70000 |
| C | 3.01700  | 10.69600 | 193.10800 |
| C | 1.94400  | 10.91500 | 192.16900 |
| C | 1.80000  | 12.23000 | 191.54800 |
| C | 0.74400  | 12.40000 | 190.66300 |
| C | -0.19500 | 11.37000 | 190.32400 |
| C | 0.00000  | 10.07600 | 190.94500 |
| C | 1.08200  | 9.86500  | 191.83900 |
| O | 3.79100  | 11.81100 | 195.14600 |
| O | 4.90200  | 7.78600  | 194.33800 |
| H | 5.74600  | 7.70400  | 194.96400 |
| O | 6.35000  | 9.91000  | 195.61200 |
| H | 7.20200  | 10.31700 | 195.12800 |
